# Supplementary material for: Heteroleptic naphthalo-phthalocyaninates of lutetium: synthesis and spectral and conductivity properties
Source: Royal Society of Chemistry journal article supplement (doi:10.1039/c5dt00635j), 2015-01-01
Supplement: c5dt00635j1.pdf [file c5dt00635j1.pdf]

**Supporting Information**

**Heteroleptic naphthalo-phthalocyaninates of lutetium:  
synthesis and spectral and conductivity properties**

Tatiana V. Dubinina,<sup>\*a,b</sup> Anton D. Kosov,<sup>a</sup> Elizaveta F. Petrusevich,<sup>a</sup> Sergey S. Maklakov,<sup>c</sup>  
Nataliya E. Borisova,<sup>a</sup> Larisa G. Tomilova<sup>a,b</sup> and Nikolay S. Zefirov<sup>a,b</sup>

*[a] Chemistry Department, M.V. Lomonosov Moscow State University, 1 Leninskie Gory,  
119991 Moscow, Russian Federation*

*Fax: +7 (495) 939 0290*

*E-mail: [dubinina.t.vid@gmail.com](mailto:dubinina.t.vid@gmail.com)*

*[b] Institute of Physiologically Active Compounds, Russian Academy of Sciences, 1 Severny  
proezd, 142432 Chernogolovka, Moscow Region, Russian Federation*

*Fax: +7-496-524-9508*

*E-mail: [tom@org.chem.msu.ru](mailto:tom@org.chem.msu.ru)*

*[c] Institute for Theoretical and Applied Electromagnetics, Russian Academy of Sciences,  
125412, 13 Izhorskaya St., Moscow, Russian Federation*

## Contents list

Table S1. High-resolution mass spectrometry MALDI TOF/TOF data.

Table S2.  $^1\text{H}$  NMR data.

Figure S1. MALDI-TOF mass spectrum of a reaction mixture for synthesis of complex **3c**.

Figure S2-S6. High-resolution MALDI-TOF/TOF mass spectrum of **3b-3f**, isotopic patterns for the molecular ion (inset A) and simulated MS patterns of the molecular ion (inset B).

Figure S7.  $^1\text{H}$  NMR spectra of complexes **3b** and **3e**.

Figure S8.  $^1\text{H}$  NMR spectra of complexes **3c** and **3f**.

Figure S9. UV-Vis spectra of reduced by  $\text{N}_2\text{H}_4\cdot\text{H}_2\text{O}$  forms of heteroleptic complexes **3** in DMSO.

Figure S10. I-V curves for thin films of heteroleptic complexes **3**.

Figure S11. UV-Vis spectra of thin films and solutions in  $\text{CCl}_4$  for heteroleptic complexes **3**.

Figure S12-S17. Conductivity of a thin film of complexes **3a-f** as a function of temperature ( $\ln(\sigma)$  vs.  $1/T$ ).

Figure S18. Tauc plot for the Q-band of the thin film of phthalocyanine **3b**.

Figure S19. Tauc plot for the RV-band of phthalocyanine **3b**.

Table S1. High-resolution mass spectrometry MALDI TOF/TOF data.

| Compound<br>(Molecular formula)                                                                | Mass found | Monoisotopic<br>mass calculated |
|------------------------------------------------------------------------------------------------|------------|---------------------------------|
| <b>3a</b> (C <sub>128</sub> H <sub>72</sub> LuN <sub>16</sub> )                                | 2007.5519  | 2007.5534                       |
| <b>3b</b> (C <sub>128</sub> H <sub>75</sub> Cl <sub>8</sub> LuN <sub>16</sub> )                | 2290.1597  | 2290.3277                       |
| <b>3c</b> (C <sub>176</sub> H <sub>105</sub> LuN <sub>16</sub> )                               | 2616.8997  | 2616.8116                       |
| <b>3d</b> (C <sub>128</sub> H <sub>73</sub> LuN <sub>16</sub> O <sub>8</sub> )                 | 2136.4387  | 2136.5205                       |
| <b>3e</b> (C <sub>128</sub> H <sub>76</sub> Cl <sub>8</sub> LuN <sub>16</sub> O <sub>8</sub> ) | 2419.2322  | 2419.2943                       |
| <b>3f</b> (C <sub>176</sub> H <sub>106</sub> LuN <sub>16</sub> O <sub>16</sub> )               | 2873.7937  | 2873.7375                       |

Table S2. <sup>1</sup>H NMR data.

| Compound                                                           | H <sub>Ph</sub> (or H <sub>PhO</sub> ) | β-H <sub>Pc</sub> | β-H <sub>Nc</sub> | α-H <sub>Pc</sub> | α-H <sub>Nc</sub> | Solvent                                            |
|--------------------------------------------------------------------|----------------------------------------|-------------------|-------------------|-------------------|-------------------|----------------------------------------------------|
| <b>NcLuPc</b> <sup>10</sup>                                        | -                                      | 8.13              | 8.72              | 8.72              | 9.32              | [D <sub>6</sub> ]DMSO                              |
| <b>Ph<sup>h</sup>PcLu<sup>h</sup>Ph<sup>h</sup>Pc</b> <sup>4</sup> | 7.35–7.43                              | -                 | -                 | 9.02              | -                 | [D <sub>6</sub> ]DMSO–CDCl <sub>3</sub> (3:1, V/V) |
| <b>3a</b>                                                          | 7.40–7.56                              | 8.17              | 8.72              | 8.81              | 9.42              | [D <sub>6</sub> ]DMSO                              |
|                                                                    | 7.38–7.54                              | 8.16              | 8.67              | 8.83              | 9.40              | [D <sub>6</sub> ]DMSO:CDCl <sub>3</sub> (3:1, V:V) |
| <b>3b</b>                                                          | 7.40–7.54                              | -                 | 8.72              | 8.77              | 9.45              | [D <sub>6</sub> ]DMSO:CDCl <sub>3</sub> (3:1, V:V) |
| <b>3c</b>                                                          | 7.72–7.75 and 7.87–7.90                | -                 | 8.54              | 9.26              | 9.56              | [D <sub>6</sub> ]DMSO                              |
| <b>3d</b>                                                          | 7.18–7.28 and 7.44–7.50                | 7.94              | 8.08              | 8.81              | 9.15              | [D <sub>8</sub> ]THF                               |
| <b>3e</b>                                                          | 7.55–7.74                              | -                 | 8.14              | 8.61–8.73         | 9.16              | [D <sub>6</sub> ]DMSO                              |
| <b>3f</b>                                                          | 7.51–7.59 and 7.67–7.75                | -                 | 8.15              | 8.17              | 9.27              | [D <sub>6</sub> ]DMSO                              |

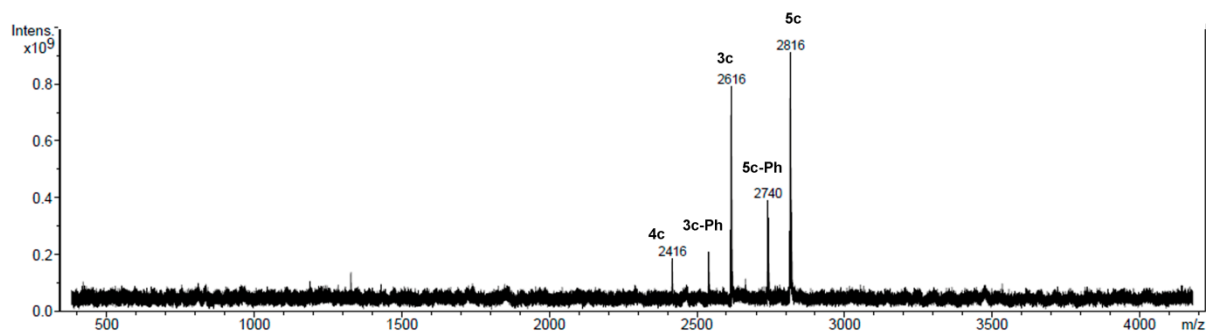

Figure S1. MALDI-TOF mass spectrum of a reaction mixture for synthesis of complex **3c**.

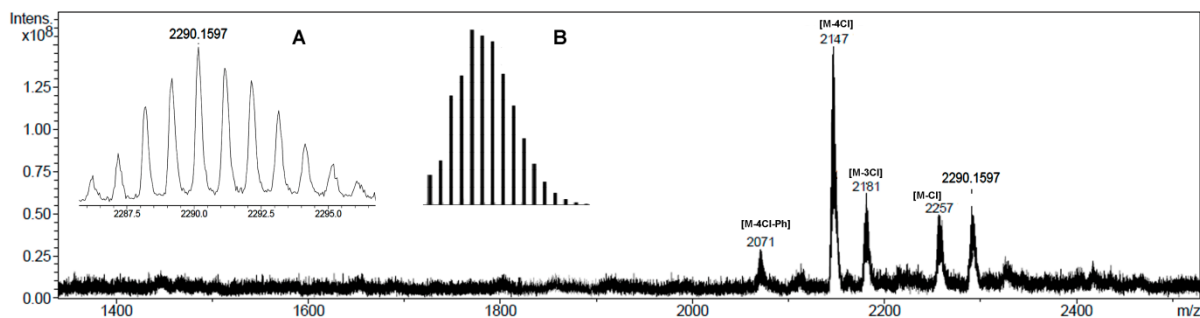

Figure S2. High-resolution MALDI-TOF/TOF mass spectrum of **3b**, isotopic patterns for the molecular ion (inset A) and simulated MS patterns of the molecular ion (inset B).

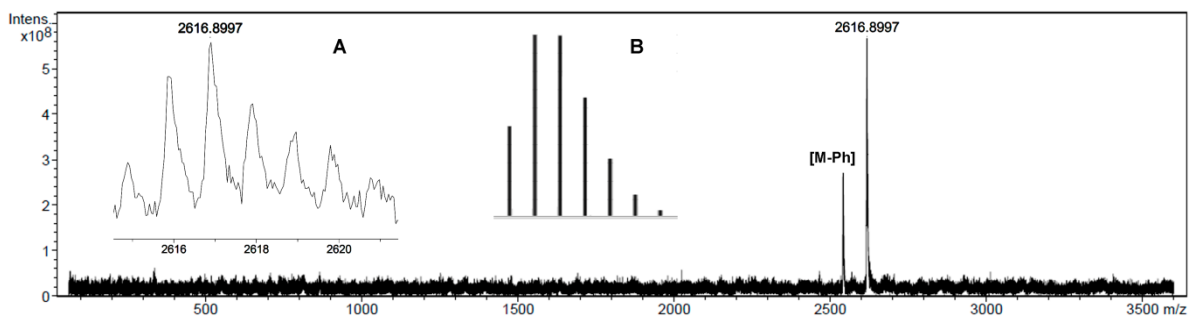

Figure S3. High-resolution MALDI-TOF/TOF mass spectrum of **3c**, isotopic patterns for the molecular ion (inset A) and simulated MS patterns of the molecular ion (inset B).

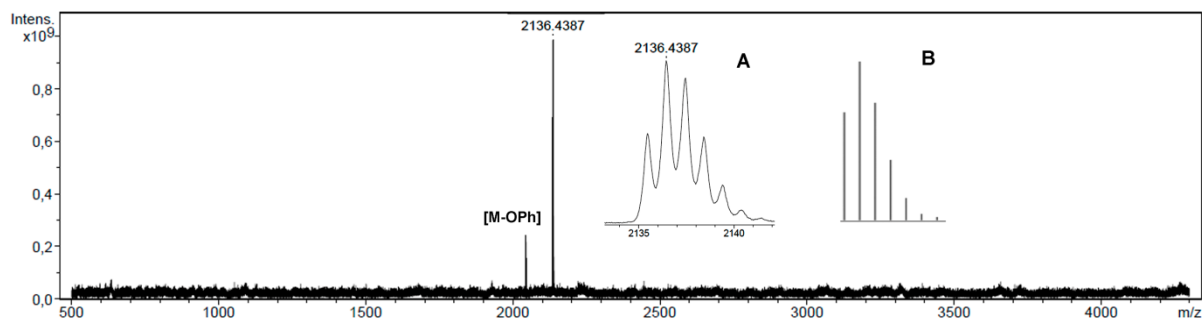

Figure S4. High-resolution MALDI-TOF/TOF mass spectrum of **3d**, isotopic patterns for the molecular ion (inset A) and simulated MS patterns of the molecular ion (inset B).

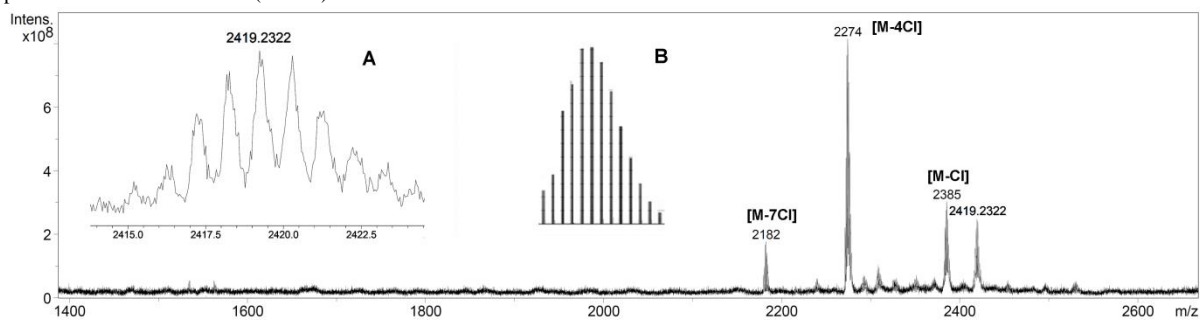

Figure S5. High-resolution MALDI-TOF/TOF mass spectrum of **3e**, isotopic patterns for the molecular ion (inset A) and simulated MS patterns of the molecular ion (inset B).

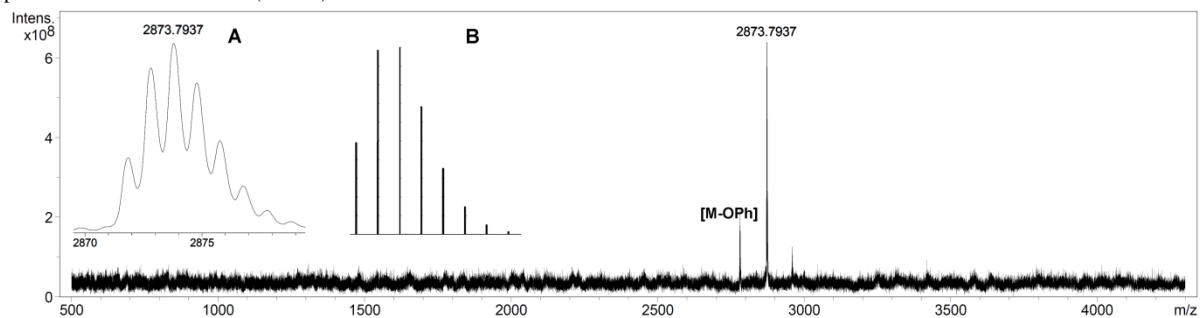

Figure S6. High-resolution MALDI-TOF/TOF mass spectrum of **3f**, isotopic patterns for the molecular ion (inset A) and simulated MS patterns of the molecular ion (inset B).

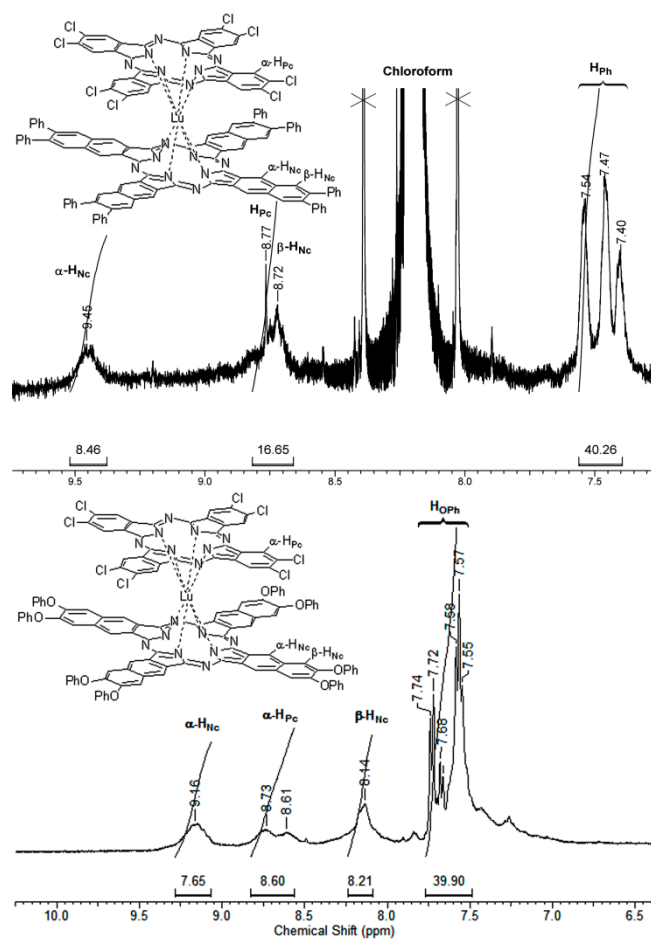

Figure S7.  $^1\text{H}$  NMR spectra of complexes **3b** and **3e**.

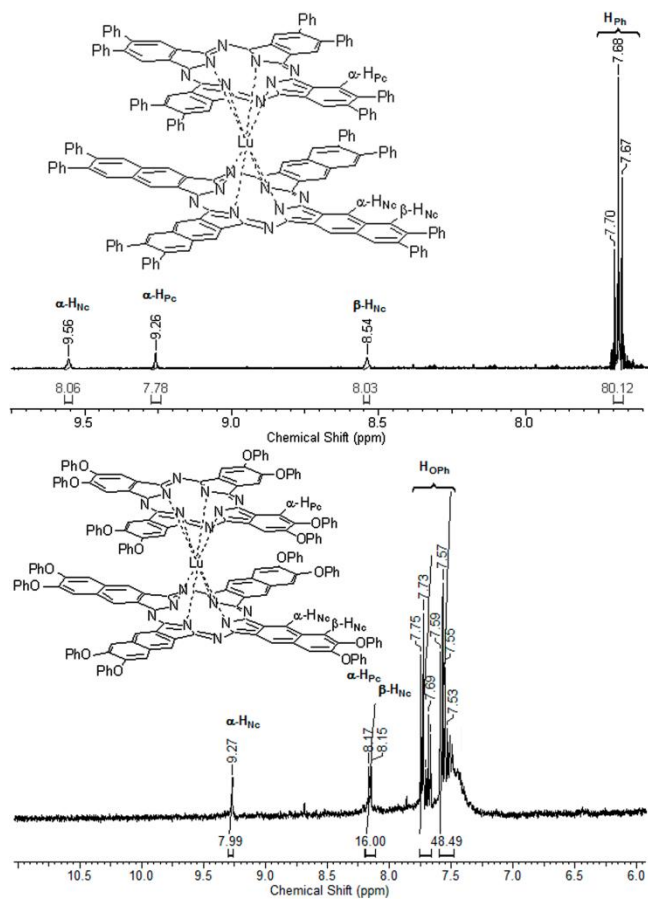

Figure S8.  $^1\text{H}$  NMR spectra of complexes **3c** and **3f**.

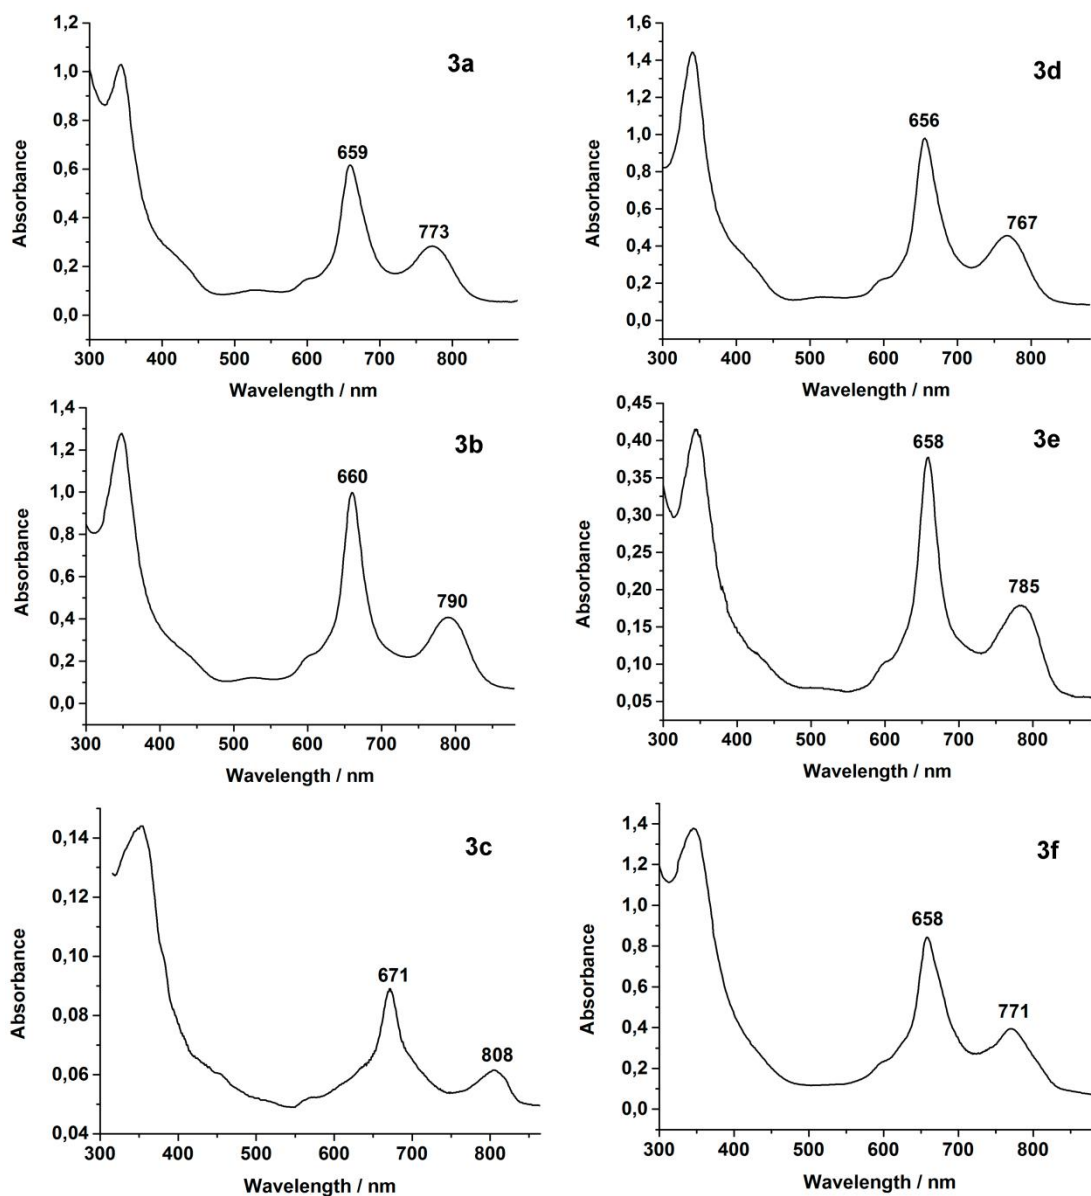

Figure S9. UV-Vis spectra of reduced by  $N_2H_4 \cdot H_2O$  forms of heteroleptic complexes **3** in DMSO.

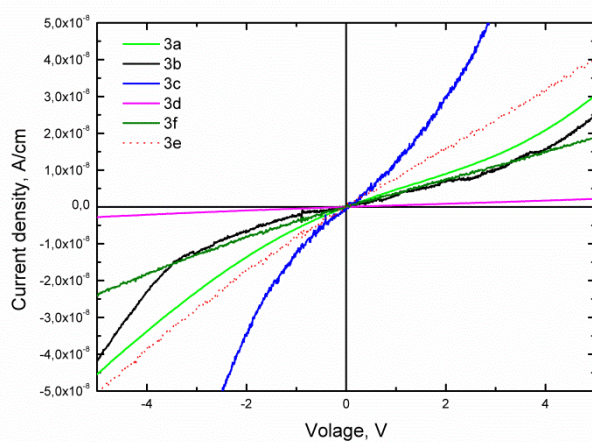

Figure S10. I-V curves for thin films of heteroleptic complexes **3**.

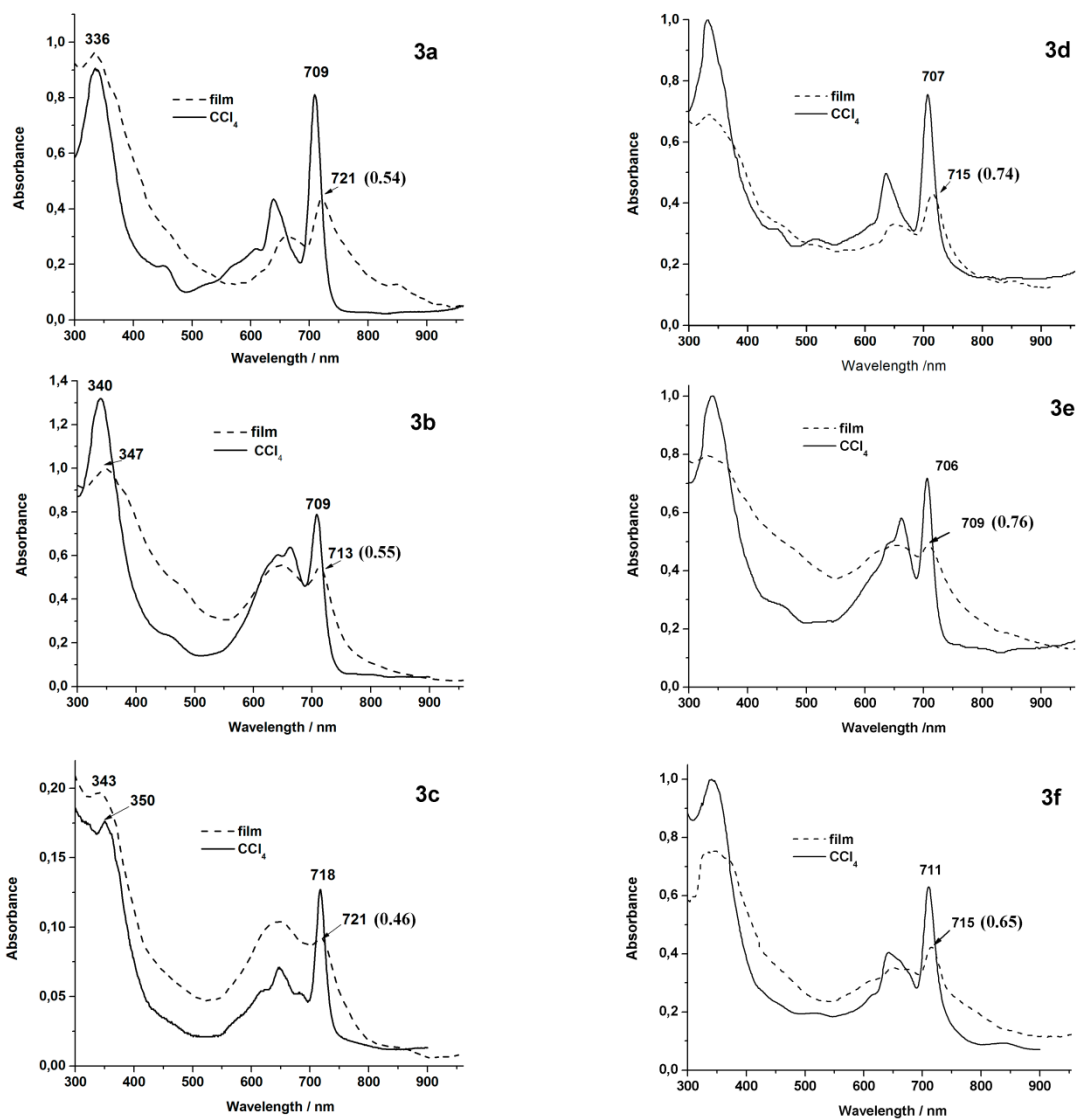

Figure S11. UV-Vis spectra of thin films and solutions in  $\text{CCl}_4$  for heteroleptic complexes **3**. The Q-band:B-band intensity ratios for thin films are given in brackets.

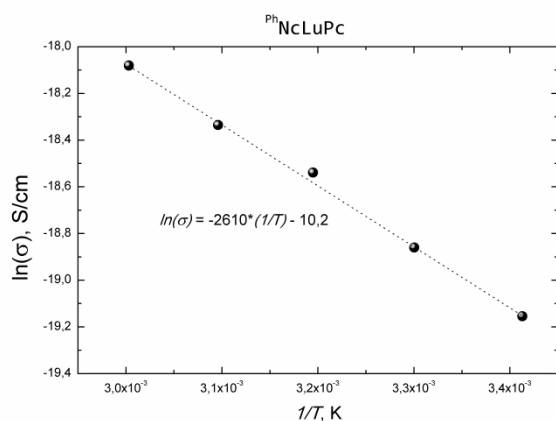

Figure S12. Conductivity of a thin film of complex **3a** as a function of temperature ( $\ln(\sigma)$  vs.  $1/T$ ).



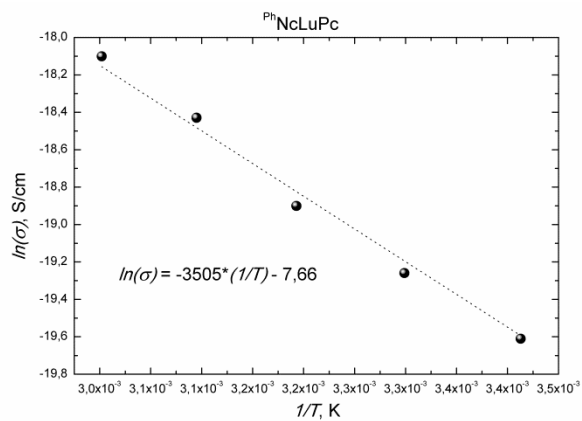

Figure S13. Conductivity of a thin film of complex **3b** as a function of temperature ( $\ln(\sigma)$  vs.  $1/T$ ).

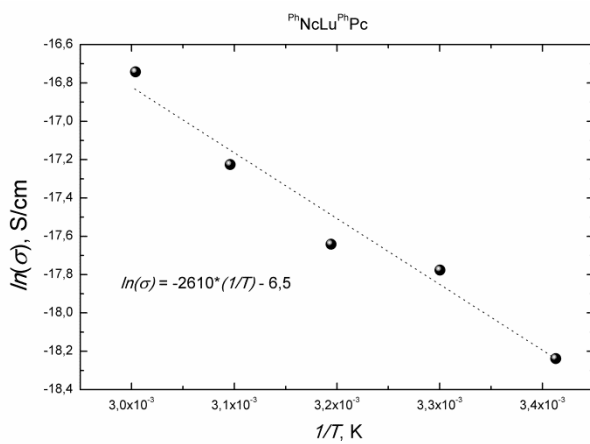

Figure S14. Conductivity of a thin film of complex **3c** as a function of temperature ( $\ln(\sigma)$  vs.  $1/T$ ).

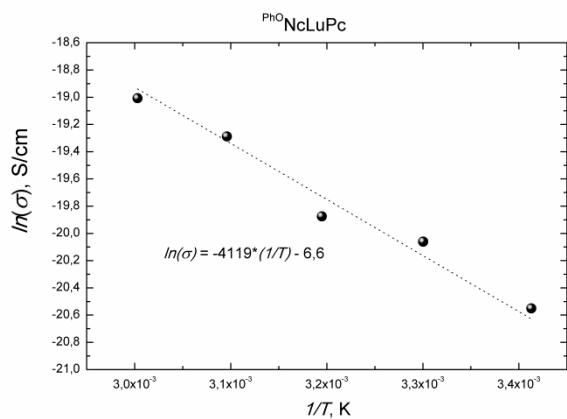

Figure S15. Conductivity of a thin film of complex **3d** as a function of temperature ( $\ln(\sigma)$  vs.  $1/T$ ).

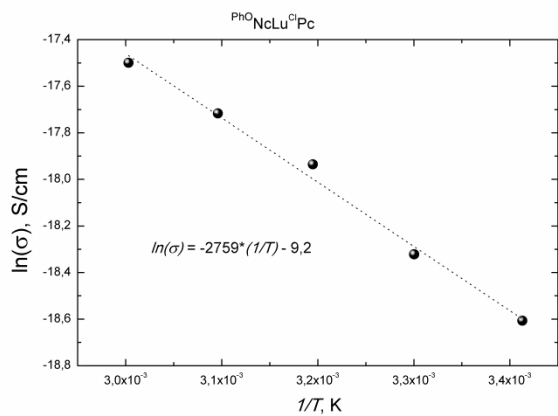

Figure S16. Conductivity of a thin film of complex **3e** as a function of temperature ( $\ln(\sigma)$  vs.  $1/T$ ).

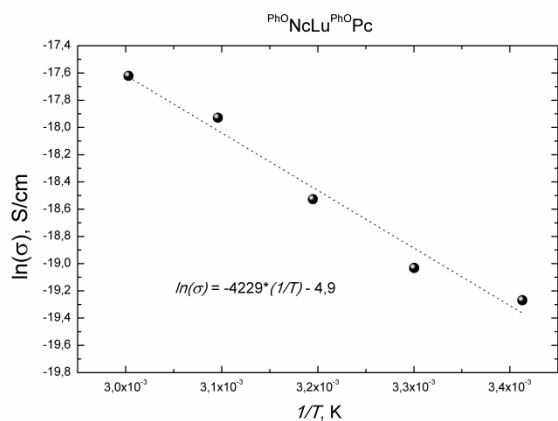

Figure S17. Conductivity of a thin film of complex **3f** as a function of temperature ( $\ln(\sigma)$  vs.  $1/T$ ).

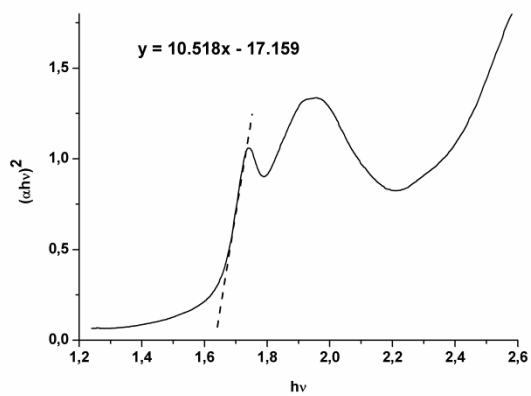

Figure S18. Tauc plot for the Q-band of the thin film of phthalocyanine **3b**.

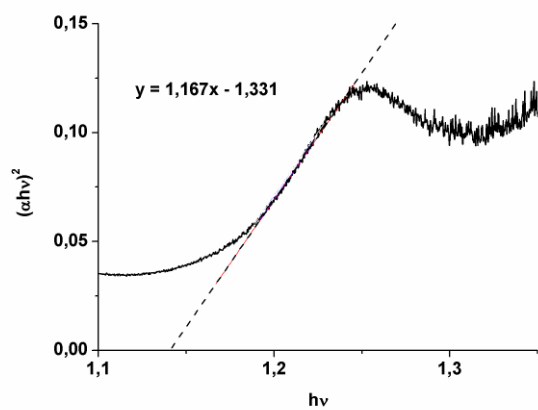

Figure S19. Tauc plot for the RV-band of phthalocyanine **3b**.
